# Supplementary material for: The terpenes camphene and alpha-bisabolol inhibit inflammatory and neuropathic pain via Cav3.2 T-type calcium channels
Source: Springer Nature journal article supplement (doi:10.1186/s13041-021-00876-6), 2021-11-14
Supplement: MOESM1 [file 25664538]

**a**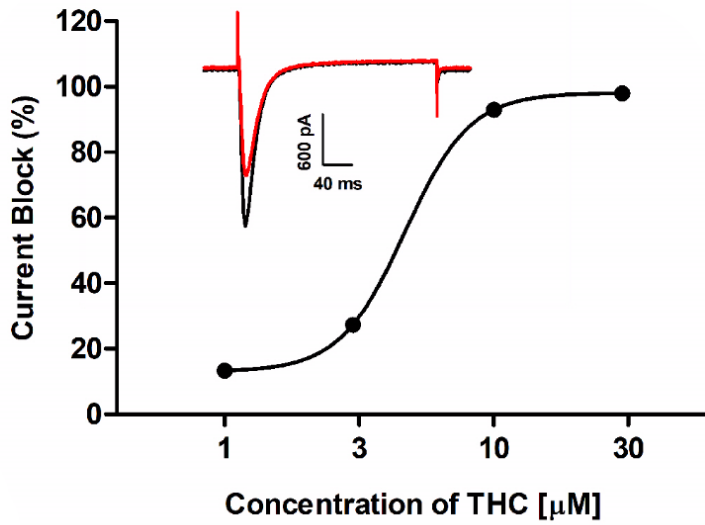**b**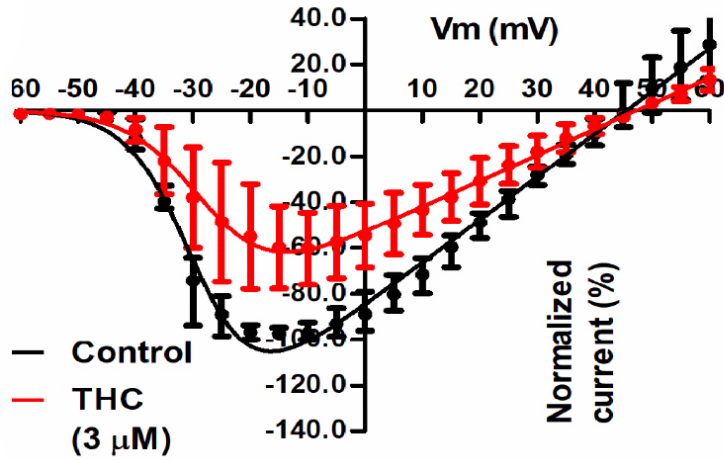**c**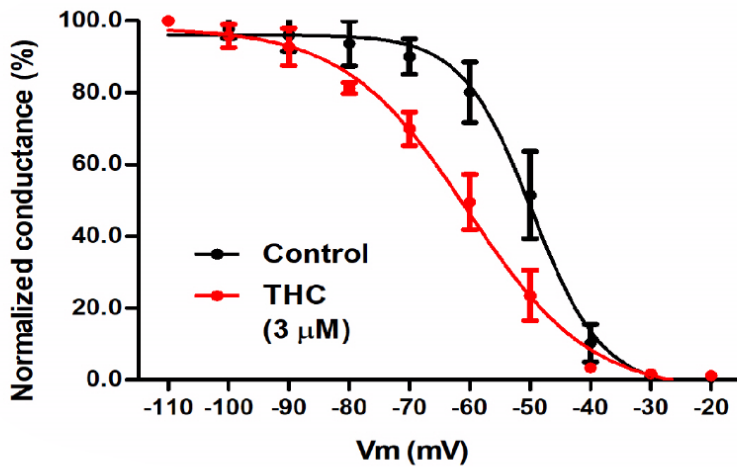

**Figure S1:** Supplemental figure examining the effects of THC on Cav3.2 channels.

**a)** Dose-response relation for THC inhibition of Cav3.2. The  $IC_{50}$  obtained from the fit was  $4.67 \pm 0.19 \mu\text{M}$  ( $n = 4$  per dose). The insert shows a representative current before and after the application of  $3 \mu\text{M}$  of THC. **b)** Effect of THC on the current–voltage relation of Cav3.2. The half activation potentials obtained from the fitted curves were  $-29.1 \pm 0.5 \text{ mV}$  and  $-27.3 \pm 1.3 \text{ mV}$  before and after the application of THC, respectively ( $3 \mu\text{M}$ ,  $n = 4$ ,  $p = 0.25$ , Paired  $t$  test). **c)** Effect of THC on the steady-state inactivation curve of Cav3.2. The half-inactivation potentials from the fitted curves were  $-49.7 \pm 0.7 \text{ mV}$  and  $-60.4 \pm 0.9 \text{ mV}$  before and after the application of THC ( $3 \mu\text{M}$ ,  $n = 4$ ,  $p = 0.004$ , Paired  $t$  test).
